# Supplementary material for: Synthesis of ordered mesoporous silica templated with biocompatible surfactants and applications in controlled release of drugs
Source: Royal Society of Chemistry journal article supplement (doi:10.1039/c2jm16291a), 2012-01-01
Supplement: c2jm16291a.pdf [file c2jm16291a.pdf]

# Synthesis of ordered mesoporous silica templated with biocompatible surfactants and applications in controlled release of drugs

Pablo Botella,\* Avelino Corma\* and Manuel Quesada

Instituto de Tecnología Química (UPV-CSIC), Avda. Los Naranjos s/n, 46022 Valencia, Spain

## Supporting Information

### Materials characterization

#### *Nitrogen adsorption-desorption isotherms*

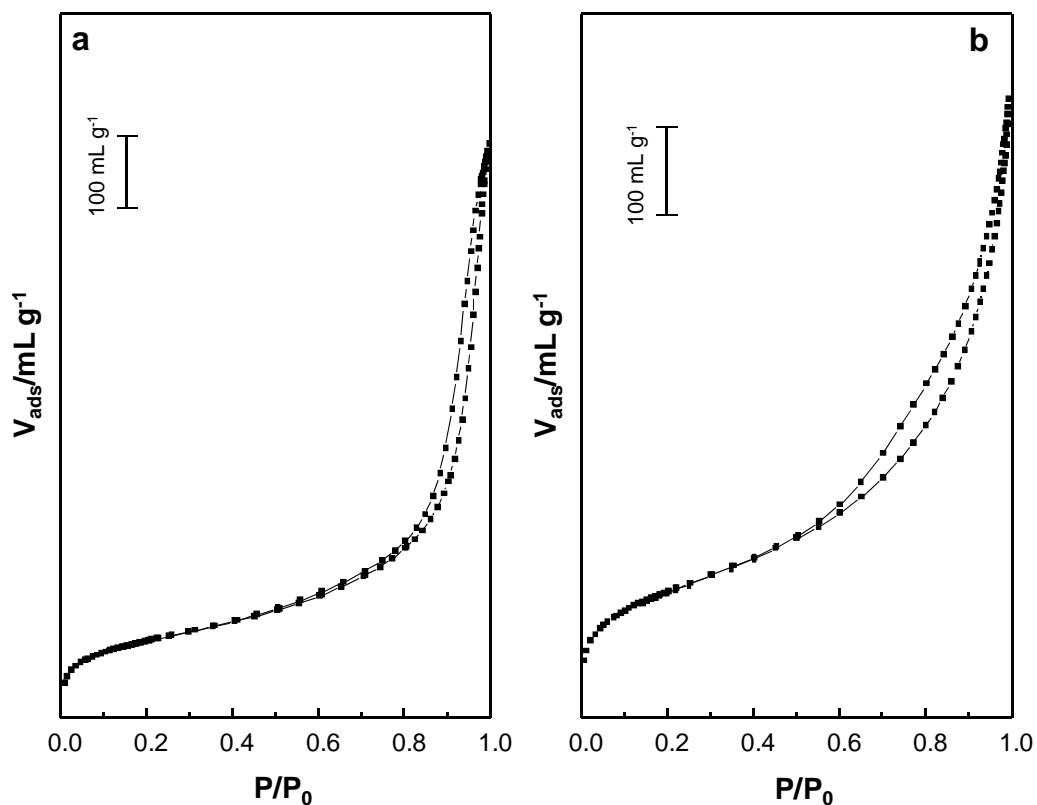

**Fig. S1** Representative nitrogen adsorption-desorption isotherms at -196 °C: (a)  $\text{SC}_{10}\text{M-2}$ ; (b)  $\text{SC}_{12}\text{M-2}$ .

**Table S1** Textural characteristics of heat-treated (500 °C) materials.

| Sample               | $S_{\text{BET}}^a$<br>( $\text{m}^2 \text{g}^{-1}$ ) | $V_p$<br>( $\text{cm}^3 \text{g}^{-1}$ ) | Pore diameter <sup>b</sup><br>(nm) |
|----------------------|------------------------------------------------------|------------------------------------------|------------------------------------|
| SC <sub>10</sub> M-2 | 392                                                  | 0.81                                     | 3.8                                |
| SC <sub>12</sub> M-2 | 512                                                  | 0.82                                     | 3.8                                |

<sup>a</sup> BET specific surface area.<sup>27</sup>

<sup>b</sup> Average mesopore diameter estimated from the desorption branch of the nitrogen isotherms using the BJH method.<sup>28</sup>

<sup>13</sup>C-MAS-NMR spectra

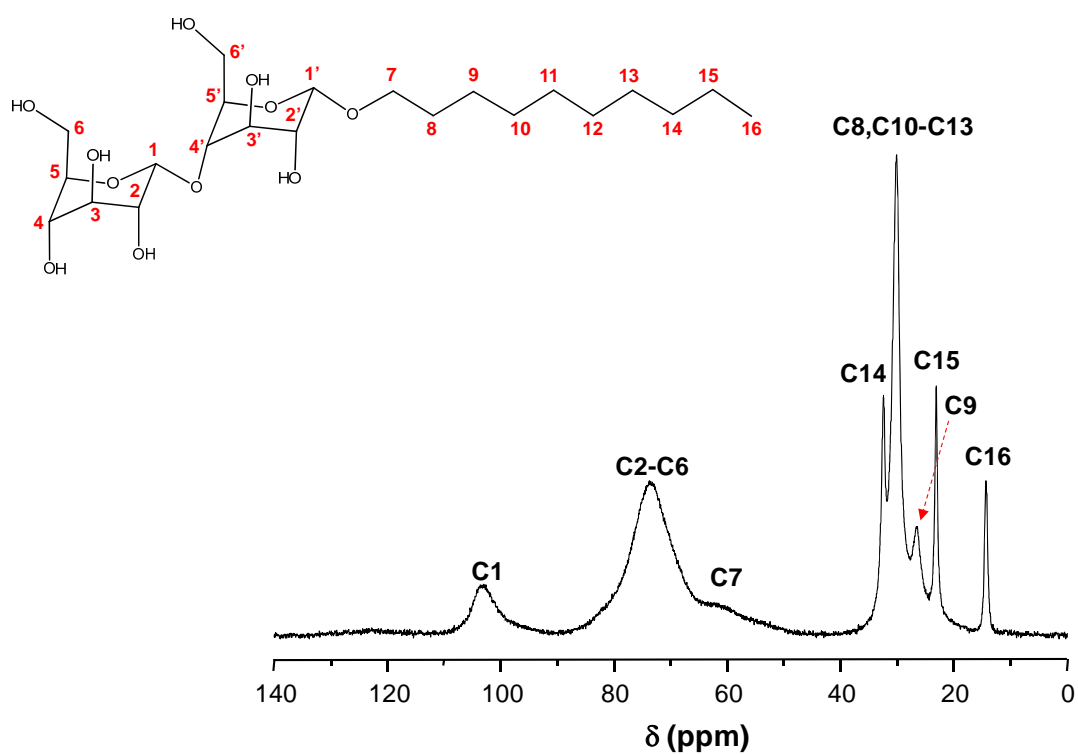

**Fig S2** Representative <sup>13</sup>C-MAS-NMR spectrum of alkyl maltosides: n-decyl β-D-maltoside.

FTIR spectra

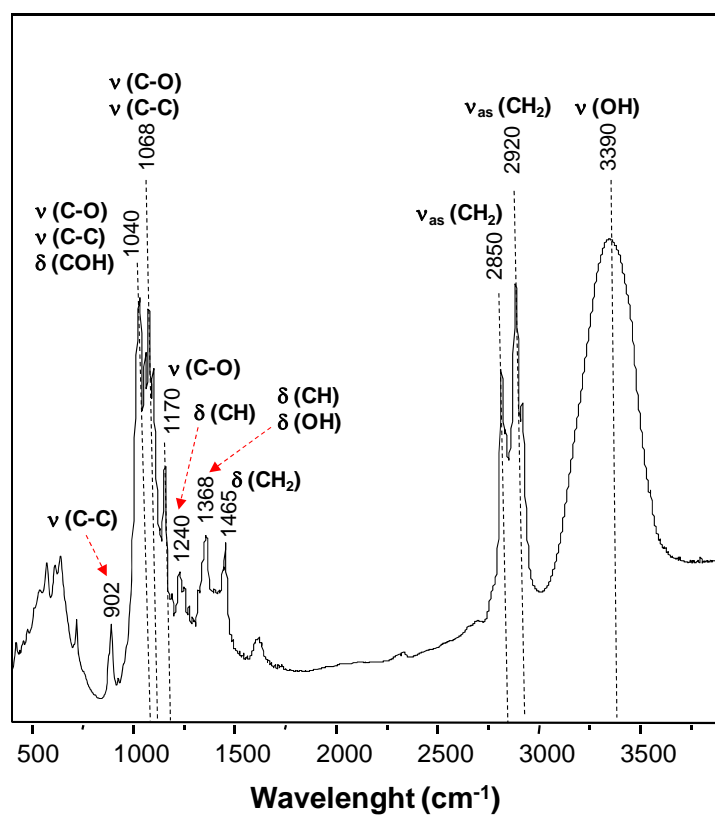

**Fig S3** Representative FTIR spectrum of alkyl maltosides: n-decyl  $\beta$ -D-maltoside. Assignments were done according to ref. 38.

*X-Ray diffraction*

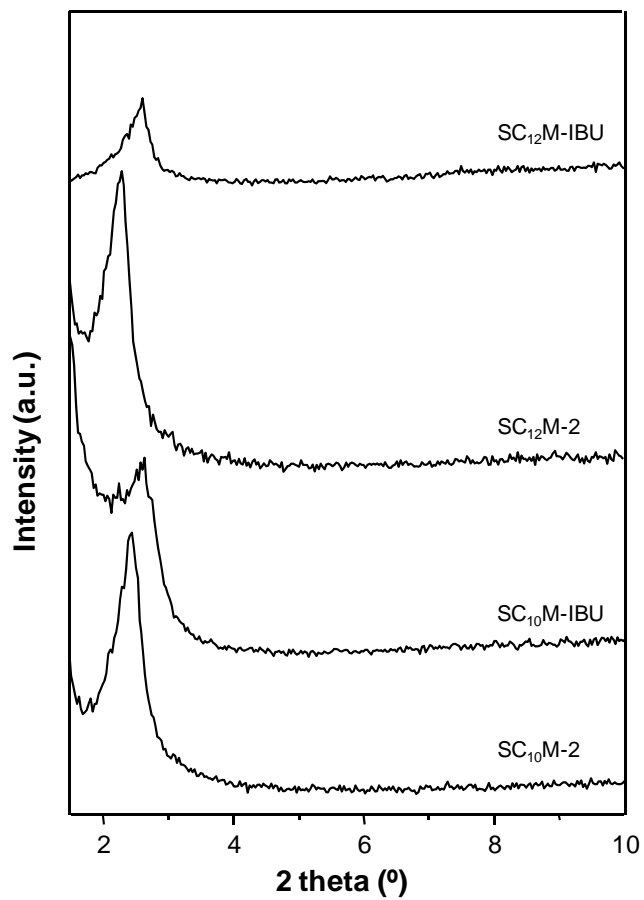

**Fig S4** Powder XRD files of IBU-containing samples and their corresponding pattern materials.
